# Supplementary material for: APOL1 renal risk variants promote cholesterol accumulation in tissues and cultured macrophages from APOL1 transgenic mice
Source: PubMed Central journal article supplement (PMC6472726; doi:10.1371/journal.pone.0211559), 2019-04-18
Supplement: pone.0211559.s002.pdf [file pone.0211559.s002.pdf]

## Supplemental Figure 2

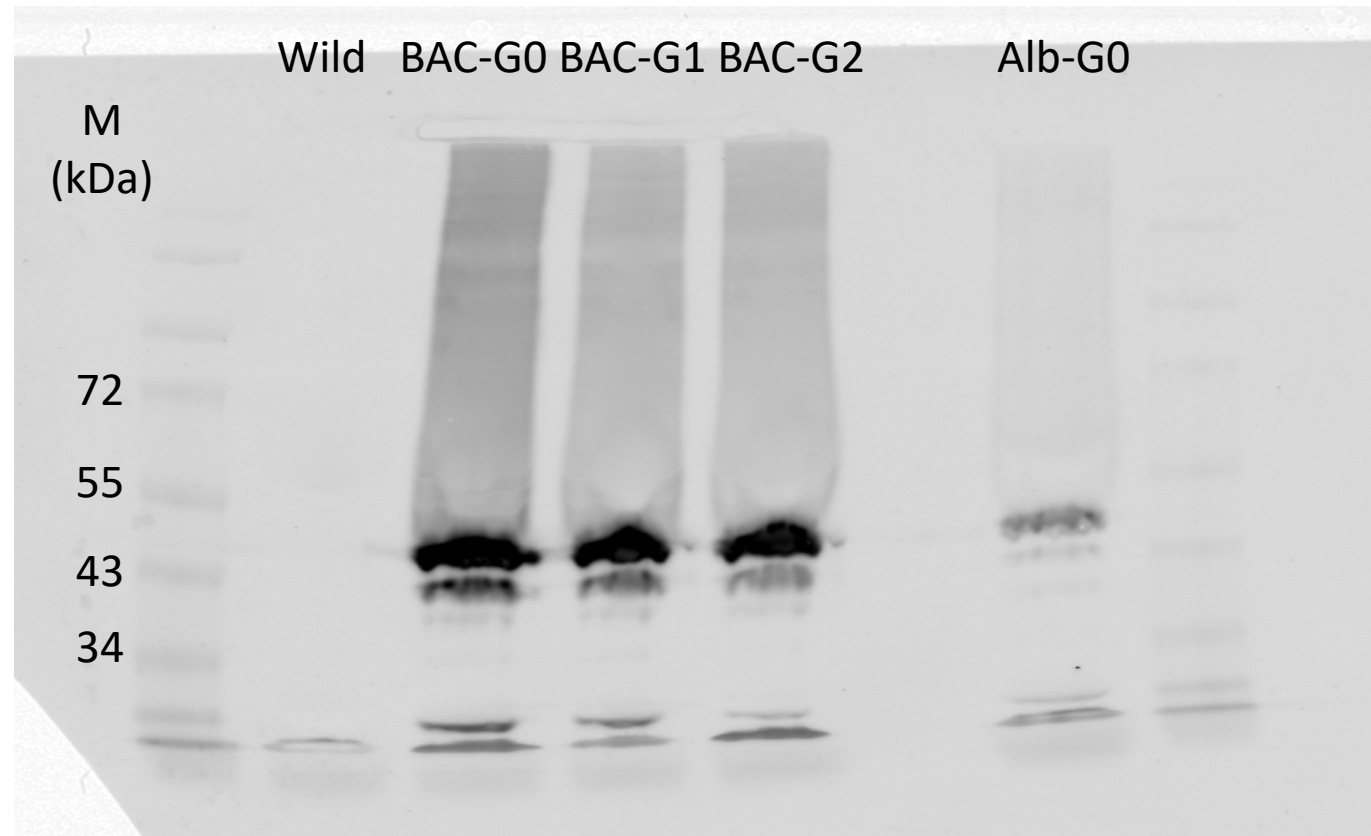

**Legend.** Shown is a Western blot for APOL1, which appears as a dimer located at approximately 42 and 44 kDa. Serum (2  $\mu$ l) from the following mice were run on the gel: wild-type mouse (as a negative control), BAC APOL1-G0 mouse, BAC APOL1-G1 mouse, BAC-APOL1G2 mouse and as a positive control, mouse expressing APOL1-G0 under the control of an albumin promoter.
